# Supplementary material
Source: publisher figshare collection journal article supplement (https://acs.figshare.com/ndownloader/files/26394275)
Supplement: Supplementary file 1 [file 26394275]

## Sheet: Supporting information
Supporting information for “Machine Learning Enables Rapid Screening of Fly Ash Reactivity”
The full fly ash dataset used for the machine learning analysis. Here, Columns C-to-H detail the XRF compositions for the 107 fly ash samples involved in this study, and Columns I-to-J are the target properties of the prediction.
Reference Number (See Section S1 for details)	ID	Al2O3	CaO	Fe2O3	SiO2	MgO	Na2O+0.658K2O	Amorphous content (mass fraction of the bulk material)	Number of constraints per atom, n_c
1	FA-1	29.5	1.1	4.6	53.8	0.7	1.8476	72.645	3.3811
	FA-2	20.7	10.2	7.1	51.4	3	1.2554	78.065	3.09412
	FA-3	17.8	10.6	7.6	55.3	2.3	1.0238	73.29	3.11317
	FA-4	22.8	11.9	3.8	51.6	2	0.7264	73.806	3.08714
	FA-5	21.6	13.6	4.3	42.9	2.5	8.3632	84.903	2.97102
	FA-6	18.1	14.5	7.8	49.9	2.8	0.8922	71.871	3.04243
	FA-7	21	15.3	5.1	45.7	3.6	1.3264	77.032	2.96974
	FA-8	19.2	17.2	5.5	34.9	3.5	8.6632	86.71	2.87139
	FA-9	18.9	21	6.5	37.4	4.3	1.4632	74.71	2.85949
	FA-10	19.3	22.9	6.4	33.9	4.6	1.3974	68	2.73409
	FA-11	18.4	23.1	6.6	34.4	4.6	1.4632	65.548	2.80595
	FA-12	19.4	24.3	6	33.5	5.4	1.3974	69.935	2.67222
	FA-13	18.6	24.7	6.4	31.8	4.4	1.2974	72.129	2.68888
	FA-14	19.3	25.4	6	32.5	4.4	1.2316	77.548	2.6342
	FA-15	19.5	25.5	5.6	30.8	4.5	1.3974	75.742	2.64296
	FA-16	17.2	25.8	5.8	32	6.1	1.4974	68.387	2.59163
	FA-17	17.3	26.6	5.8	30.9	7.8	1.5316	49.032	2.49929
	FA-18	17.1	29.2	5.8	27.1	6.2	1.2316	57.935	2.61418
2	Ban.1-T	30.3	0.5	4.6	58.8	1.42696	1.1	70.7	3.1718
	Ban.2-T	31	0.9	4.6	58.4	1.21443	1.1	65.8	3.16531
	Roo.1-T	30.5	0.7	3.8	56.6	2.18598	1.2	72.6	3.15789
	Roo.2-T	31.1	1.3	4.5	55.7	1.94309	1	73.3	3.14048
	Nag.1-T	29.8	1.3	5.8	57.9	1.27515	1	71.9	3.17434
	Nag.2-R	25	1.2	3.5	58	3.46113	0.9	78	3.26669
	Nag.3-R	20.1	4.5	10.2	51	3.40041	3	73.3	3.15199
	Alb.1-R	23	9.6	3.2	55.7	1.63948	3.1	90.6	3.16479
	Alb.2-R	24	9.4	4.4	51.6	2.00381	4	92.5	3.14766
3	CRE	28.3	4.5	5.1	46.2	1.3	3.5242	67	3.25123
	MBME	25.1	9.1	4.5	47.1	1.3	1.8528	68	3.16209
	PKE	27.9	4.7	5.2	48.3	1.7	1.5844	63	3.30155
	PSE	21.7	7.5	7.5	52	1.6	1.7476	76	3.15959
	WPPE	20.2	4.8	5.4	48.7	4.5	3.1346	73	3.24946
4	AT	21.6	12.3	4.2	47.7	2.7	2.4922	88.3	3.04893
	BC	30.5	1.2	4.6	55.8	0.7	1.8134	78.7	3.07427
	BBR	18.4	14.1	7.9	48.4	2.2	1.3238	76.4	3.37252
	CE	16.4	11.2	6	54.1	4.1	2.4502	87.2	3.13795
	CC	21	12.8	4.9	48.2	3.4	2.2896	84.8	2.99425
	FO	25.1	5.6	5.6	59.4	0.9	0.858	61.4	3.30369
	LEGS	17.8	10.7	7.7	54.1	2.3	1.4212	80.5	3.08684
	ML	19.9	9.4	8.7	54.8	2.4	1.3238	77.9	3.12063
5	A-FA-0	27.21	1.26	7.98	55.28	1.23	2.46	67.5	3.35474
	B-CA-4	26.21	4.01	13.87	42.84	1.25	1.89	56.9	3.31901
	C-CA-15	23.08	0.77	8.66	47.06	0.76	1.73	66.3	3.44495
6	C1	17.4	26.45	7.15	35.44	5.73	2.24874	55	2.76199
	C2	18.03	25.9	6.02	36.08	5.24	2.16268	57	2.75751
	C3	20.44	21.35	6.29	40.08	4.56	1.92718	59	2.95982
	F1	15.77	15.05	6.28	50.75	4.57	4.69812	83	3.08177
	F2	20.45	12.71	5.62	53.97	2.84	1.30038	75	2.99573
	F3	22.85	5.2	4.47	60.48	1.19	3.00198	71	3.23868
	F4	27.71	1.64	6.35	57.98	1.07	2.27002	63	3.34499
7	FF	20.42	9.9	8.18	55.11	2.72	1.46	77.3	3.07034
8	FA1	19.8	20.7	8.2	42.3	2.2	1.287	89.7	2.97777
	FA2	18.2	26.5	6.4	33.6	6.4	2.1632	85.9	2.6803
	FA3	18	27.5	5.7	33.7	6.2	2.3632	75.1	2.75658
	FA4	23.3	1.6	6.5	59.7	1	1.816	71.7	3.38362
	S1	11.6	38.9	0.5	36.7	7.8	0.6606	100	2.42462
	S2	16.5	35.8	0.9	31.9	10.8	0.6	100	2.4028
9	WSA-650	0.28	9.73	1.13	86.5	0.78	1.11332	99.3	3.48231
	RSA-650	0.47	9.48	0.74	88.2	0.56	0.37398	95.8	3.48121
	RSA-500	1.4	10.73	1.02	85.7	0.6	0.45372	88.2	3.42209
	Silica fume	0.13	0.43	0.05	96.96	0.96	0.33004	99.9	3.65789
	Fly ash	20.42	9.9	8.18	55.11	2.72	0	77	3.06625
10	NP	13.51	3.33	1.82	66.97	0.65	6.05456	91.8	3.45392
11	CFA	19.8	20.7	8.2	42.3	2.2	1.287	87.2	3.00112
	SFA	24.4	0.1	2.2	70.8	0.2	0.4948	65.8	3.48279
12	D	28.31	1.98	5	59.31	0.42	1.73054	27.4	3.09388
	N	26.97	3.51	6.13	56.92	0.78	1.82266	36.1	2.91259
	M	28.71	2.88	7.9	54.32	0.56	1.73054	26.6	3.05456
	B	25.06	2.9	7.62	58.64	0.88	1.55946	36.9	3.10063
13	1	20.4	16	4.2	51.9	3.8	1.6264	50.05	2.58892
	2	21	14.3	5.1	56.5	3.7	1.8896	48.28	2.7534
	3	25.2	8.3	5	64.8	2	1.1554	61.46	3.12328
	4	18	9.1	3.2	75.1	1.3	5.1056	74.75	3.355
	5	20.7	18.3	5	48.2	4	1.758	46.89	2.70232
	6	22.1	23.1	5.1	36.4	4.1	2.029	56	2.56798
	7	18.8	27.7	5.4	36	6.3	2.3974	35	2.53733
14	B	27.13	2.74	7.28	55.45	1.2	3.4279	54.94	3.13311
	D	29.01	1.65	5.47	56.57	0.63	2.84496	38.04	3.16328
	K	29.71	1.36	6.33	55.17	0.7	2.23228	44.52	3.2296
	M	31.4	3.8	7.85	48.81	0.7	2.04016	35.17	3.0197
	N	26.46	3.97	7.17	54.55	1.17	3.31526	53.62	3.07834
	R	29.42	1.63	5.86	56.23	0.8	2.51046	45.57	3.18355
	S	29.72	1.3	6.32	55.16	0.77	2.6231	46.14	3.21325
	V	29.9	1.11	5.76	56.06	0.67	2.3515	39.22	3.19976
15	Narcea	23.3	4	6.9	55.2	2.5	3.2004	86	3.27791
	Barrios	35.6	8.4	2.6	42.6	2.1	0.6948	48	3.16105
	Escucha	26.7	2.3	12.3	49.5	0.9	1.5502	56	3.36653
	Meirama	17.6	11.8	10.4	49.2	2	0.6632	63	3.11621
	Teruel	23.9	5.4	16	48.3	1	1.1212	63	3.26484
	Espiel	28.5	2	5.9	52.3	1.5	3.132	86	3.27805
	Compostilla	25.5	2.8	7.5	51.2	2	3.3662	89	3.26228
	Robla	23.2	8.9	14.3	44.1	1.8	2.0108	85	3.16162
	Pontes	30.1	5.6	12.6	41.5	1.6	1.8502	52	3.20084
	Ribera	30.6	3	7.2	48.9	1.6	3.1662	74	3.25895
	Puertollano	27.4	0.8	7.3	58.6	1	1.8792	65	3.4043
	Alkaline	24.8	6.8	9	46.8	3.7	2.516	63	3.20487
	Nijmegen	25	6.4	8.8	45.3	1.4	1.5238	82	3.1488
	Neutral	26.1	3.1	7.4	53.3	0.6	0.4948	80	3.27487
	CCB	27	0.5	3.3	59.6	0.9	2.2082	80	3.34372
	Acid	28.9	1.8	8.4	51.3	1	2.145	83	3.26066
	Amer-8	26.5	6.1	7.1	45.2	1.6	1.5896	78	3.15794
	Amer-9	25.8	5.6	7	52.4	1.6	1.6212	77	3.17469
	Hemweg-8	26	2.4	8.6	53.2	1.6	2.2766	84	3.27594
	Lignite	17.9	27.3	8.4	28.5	3.8	0.858	62	2.63091
	Fusina	25.9	2.3	8.8	48.2	1.5	2.2108	72	3.34883
	Monfalcone	33.4	2.4	6.4	50.8	0.8	0.8606	73	3.31255
	Sardegna	29	10	3.8	41.7	2.4	1.0264	74	3.08683
